# Supplementary material for: Nanoarchitectured metal–organic framework/polypyrrole hybrids for brackish water desalination using capacitive deionization
Source: Royal Society of Chemistry journal article supplement (doi:10.1039/c9mh00306a), 2019-01-01
Supplement: c9mh00306a1.pdf [file c9mh00306a1.pdf]

## Experimental Section

### Chemical and Materials

Pyrrole, methyl orange (MO), FeCl<sub>3</sub>, Co(NO<sub>3</sub>)<sub>2</sub>·6H<sub>2</sub>O, 2-methylimidazole (2-MeIM), ethanol and methanol were purchased from Wako Pure Chemical Industries and used without further purification. NaCl, poly(vinylidene difluoride) (PVDF) and N-methyl 2-pyrrolidinone (NMP) was purchased from Sinopharm Chemical Reagent Co., Ltd. Vulcan XC 72 was purchased from Cabot Corporation.

### Synthesis of PPy nanotubes

Firstly, 0.05 g of MO was thoroughly dispersed in 60 mL of deionized water. Then 0.243 g of FeCl<sub>3</sub> was added to the MO solution under intense stirring (300 rpm), cooled in an ice bath. After the inclusion of pyrrole (0.105 mL), the mixed solution was kept for 24 h under stirring (under dark conditions). Finally, the obtained precipitate was filtered and washed with a mixture of ethanol and water (for methyl orange elimination) several times and dried.

### Synthesis of ZIF-67/PPy hybrid

40 mg of PPy nanotubes were first dispersed in 20 mL of methanol under ultrasonication for 1 h. Then 454 mg of Co(NO<sub>3</sub>)<sub>2</sub>·6H<sub>2</sub>O was dispersed into the PPy nanotubes solution under stirring for 1 h to form a solution A. 513 mg of 2-MeIM was dissolved in 20 mL of methanol to form a solution B. Subsequently, solution B was added dropwise to solution A under sustained stirring for 30 min. After being kept still for 24 h, the precipitate was collected by centrifugation, washed thoroughly with methanol several times, and finally dried at 60 °C for 24 h.

### Materials characterization

The morphological characterizations were performed with a field-emission scanning electron microscope (FESEM, HITACHI SU-8230) operated at 5 kV. The interior structures were studied using a transmission electron microscope (TEM, JEOL JEM-2100F) working at an accelerating voltage of 200 kV. Powder X-ray diffraction (XRD) patterns were collected with an Ultima Rint 2000 X-ray diffractometer (RIGAKU, Japan). Fourier-transform infrared spectrum (FT-IR) spectrum was carried out by a ThermoScientific Nicolet 4700 FTIR Spectrometer using DTGS detector (wavenumber range: 400–4000 cm<sup>-1</sup>). Nitrogen sorption isotherms were carried out using a BELSORP-mini (BEL, Japan). The specific surface area (SSA) was analyzed by Multipoint Brunauer-Emmett-Teller (BET) technique.

### Electrochemical performance measurements

The electrode fabrication method is as follows: The electrode ink was prepared by mixing 80 wt% samples

with 10 wt% carbon black (Vulcan XC 72) and 10 wt% PVDF in NMP solvent under ultrasonication for 15 min. A certain volume of the ink was dropped onto the graphite paper with a thickness of 1 mm and dried at 60 °C for 12 h. The areal mass loading of each working electrode was 5 mg cm<sup>-2</sup>.

The electrochemical performances were tested by cyclic voltammetry (CV) method performed on a CHI 660E electrochemical workstation using a three-electrode system with aqueous 1 M NaCl, platinum wire and Ag/AgCl electrode as the electrolyte, counter electrode and reference electrode, respectively. The Nyquist plots obtained from electrochemical impedance spectroscopy (EIS) were studied in a frequency range of 10 mHz to 100 kHz .

Calculation of specific capacitances derived from CV curves is according to the following equation:

$$C = \frac{\int idV}{2 \times \Delta Vmv} \quad (S1)$$

where  $i$  is the current (A),  $m$  is the mass of electrode materials (g),  $\Delta V$  is the voltage window (V), and  $v$  is the scan rate (mV s<sup>-1</sup>).

### **Desalination analyses by CDI**

Each individual CDI electrode was fabricated by depositing a mixture of the sample with Vulcan XC 72 and PVDF binder on graphite paper (thickness: 1 mm). The weight ratio of sample, Vulcan XC 72, and PVDF was 8:1:1. The mixture was pressed onto graphite papers and dried in a vacuum oven at 60 °C for 12 h. Each electrode possessed a mass loading of about 10 mg cm<sup>-2</sup>.

The CDI tests were conducted using a batch-mode with a continuous recycling system. For every individual experiment, the variance in concentration of the de-aerated NaCl solution was continuously recorded and measured by the ion conductivity meter. The volume was set at 50 mL, the flow rate was fixed at 20 mL min<sup>-1</sup>, and the operating voltage was maintained at 1.2 V. The temperature was kept at 27 °C during measurement. The relationship between conductivity and concentration was obtained according to a calibration table made prior to the experiment.

To evaluate the desalination performance of ZIF-67/PPy hybrid, the CDI cell consisted of two pairs of parallel ZIF-67/PPy hybrid electrodes separated by a 200 μm thick nonconductive nylon cloth to prevent electrical short circuit and to act as a spacer channel. Additionally, anion- and cation- exchange membranes have also been used to alleviate the co-ion effect. The starting concentration of NaCl solution was about 584 mg L<sup>-1</sup>, corresponding to ~10 mM .

To evaluate the practicability of ZIF-67/PPy hybrid for brackish water desalination, the CDI cell consisted of ten pairs of parallel ZIF-67/PPy hybrid electrodes. The concentration was about 1530 mg L<sup>-1</sup>.

The desalination capacity ( $\Gamma$ , mg g<sup>-1</sup>) and mean desalination rate ( $v$ , mg g<sup>-1</sup> min<sup>-1</sup>) at  $t$  min was calculated from the following equations:

$$\Gamma = (C_0 - C_t) \times V/m \quad (\text{S2})$$

$$v = \Gamma/t \quad (\text{S3})$$

where  $C_0$  and  $C_t$  are the NaCl concentrations at initial stage and  $t$  min, respectively (mg L<sup>-1</sup>),  $V$  is the volume of the NaCl solution (L), and  $m$  is the total mass of the electrode materials (g).

Adsorption kinetics, performed on the pseudo-first- and pseudo-second-order adsorption kinetic models, offers an useful tool to determine the rate constant and to analyze the adsorption process.<sup>1-3</sup> In the present work, pseudo-first- (S4) and pseudo-second-order (S5) kinetic models were utilized for the fitting of CDI data, respectively,

$$\log(q_e - q_t) = \log q_e - k_1 t/2.303 \quad (\text{S4})$$

$$1/q_t = 1/k_2 q_e^2 t + 1/q_e \quad (\text{S5})$$

where  $q_e$  and  $q_t$  represent the desalination capacity (mg g<sup>-1</sup>) at equilibrium stage and time  $t$  (min).  $k_1$  and  $k_2$  represent the pseudo-first- and pseudo-second-order kinetic rate constants, respectively.

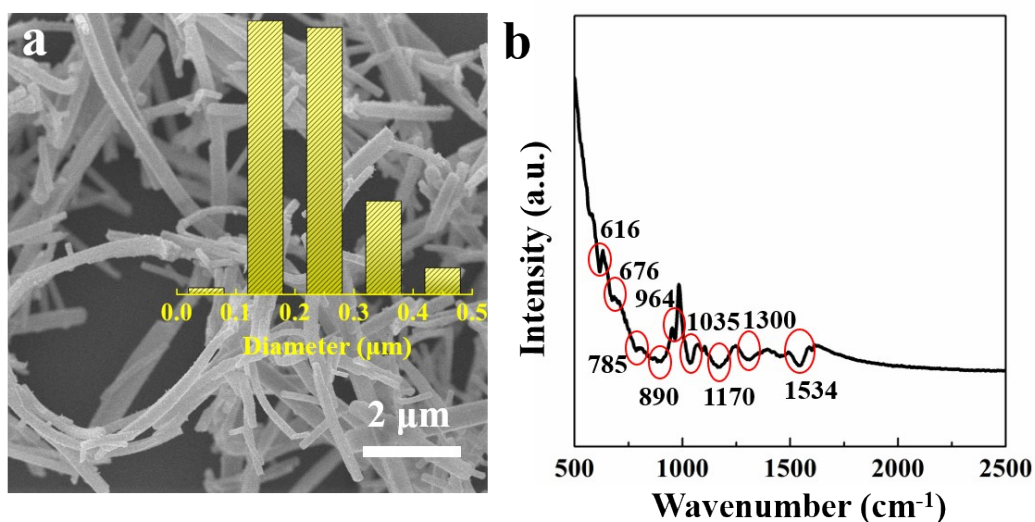

**Fig. S1** (a) FESEM image and (b) FT-IR spectrum of PPy nanotubes.

**Supplementary Note 1.** The band at about  $616\text{ cm}^{-1}$  belongs to the N-H out of plane vibration. The bands at  $676\text{ cm}^{-1}$  and  $785\text{ cm}^{-1}$  can be identified as the C-C out-of-plane ring deformation vibration and C-H out-of-plane ring deformation vibration, respectively. The band of the C-H out-of-plane deformation vibration of the ring appears at about  $890\text{ cm}^{-1}$ . The C-C out-of-plane ring deformation vibration occurs at around  $964\text{ cm}^{-1}$ . C-H and N-H in-plane deformation vibrations are responsible for the bands at  $1035$  and  $1170\text{ cm}^{-1}$ , respectively. The broad bands at around  $1300\text{ cm}^{-1}$  are attributed to C-H and C-N in-plane deformation vibrations. The band near  $1534\text{ cm}^{-1}$  corresponds to the ring-stretching vibration.

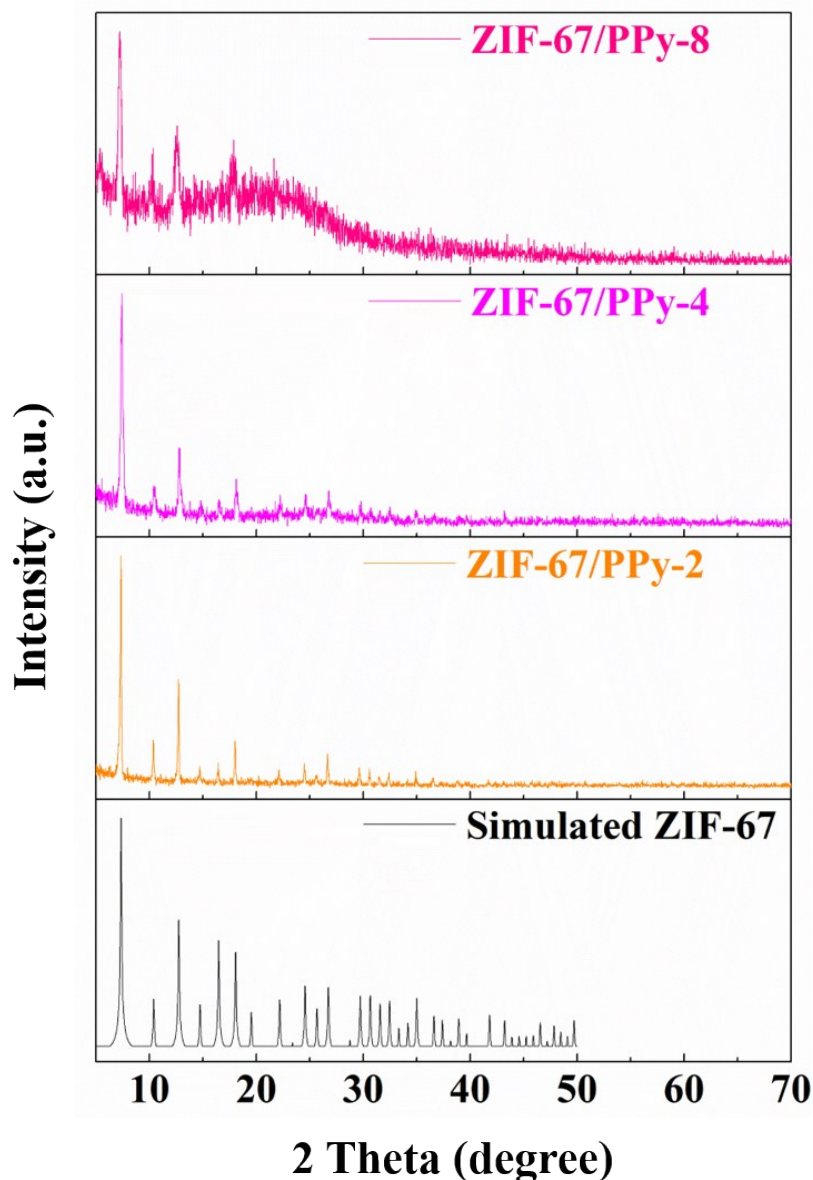

**Fig. S2** XRD patterns of simulated ZIF-67, and ZIF-67/PPy-X (X=2, 4 and 8).

**Supplementary Note 2.** To clearly study the impact of amorphous PPy nanotubes on the structure of ZIF-67/PPy, we further increased the amount of PPy nanotubes to X-fold (X=2, 4 and 8) that of ZIF-67/PPy (the typical sample shown in Main text). The samples were abbreviated as ZIF-67/PPy-X (X=2, 4 and 8). As shown in **Fig. S2**, all samples show typical diffraction peaks of ZIF-67, and moreover, with further increasing the PPy content, the impact of PPy becomes obvious. But only at excessively high PPy content (increased up to 8-fold), the diffraction peaks of PPy nanotubes will be observed.

**Table S1.**  $R_{ct}$  values of PPy nanotubes, pure ZIF-67 and ZIF-67/PPy hybrid.

| Sample                | PPy nanotubes | ZIF-67 | ZIF-67/PPy hybrid |
|-----------------------|---------------|--------|-------------------|
| $R_{ct}$ ( $\Omega$ ) | 0.62          | 3.20   | 1.32              |

**Table S2.** Comparison between ZIF-67/PPy hybrid with other EDL electrodes.

| Sample               | Specific surface area (m <sup>2</sup> g <sup>-1</sup> ) | Voltage (V) | Desalination capacity (mg g <sup>-1</sup> ) | Ref.      |
|----------------------|---------------------------------------------------------|-------------|---------------------------------------------|-----------|
| PAC/Cl               | 2652                                                    | 1.2         | 5.8                                         | 4         |
| ACP900               | 877                                                     | 1.2         | 6.87                                        | 5         |
| AC-1-2.0             | 2105                                                    | 1.0         | 9.72                                        | 6         |
| PCS1000              | 1321                                                    | 1.6         | 5.81                                        | 7         |
| AN-CFs               | 905.3                                                   | 1.2         | 12.32                                       | 8         |
| N-HPC                | 730                                                     | 1.2         | 13.76                                       | 9         |
| CCS                  | 2680                                                    | 1.2         | 16.1                                        | 10        |
| PCNSs                | 2853                                                    | 1.1         | 15.6                                        | 11        |
| G@MC-O-thin          | 1270                                                    | 1.5         | 24.3                                        | 12        |
| mGE                  | 474.0                                                   | 1.2         | 14.2                                        | 13        |
| Microporous graphene | 3513                                                    | 2.0         | 11.86                                       | 14        |
| GTAC-20              | 426.56                                                  | 1.2         | 10.94                                       | 15        |
| GS                   | 356.0                                                   | 1.2         | 14.9                                        | 16        |
| NC/rGO               | 1360                                                    | 1.2         | 17.52                                       | 17        |
| e-CNF-PCP            | 1450.6                                                  | 1.2         | 12.56                                       | 18        |
| PC-900               | 1911                                                    | 1.2         | 10.90                                       | 19        |
| ZIF-8@PZS-C          | 929                                                     | 1.2         | 22.19                                       | 20        |
| NC-800               | 798                                                     | 1.2         | 8.52                                        | 21        |
| PCP1200              | 1187.8                                                  | 1.2         | 13.86                                       | 22        |
| ZIF-67/PPy hybrid    | 1176.8                                                  | 1.2         | 11.34                                       | This work |

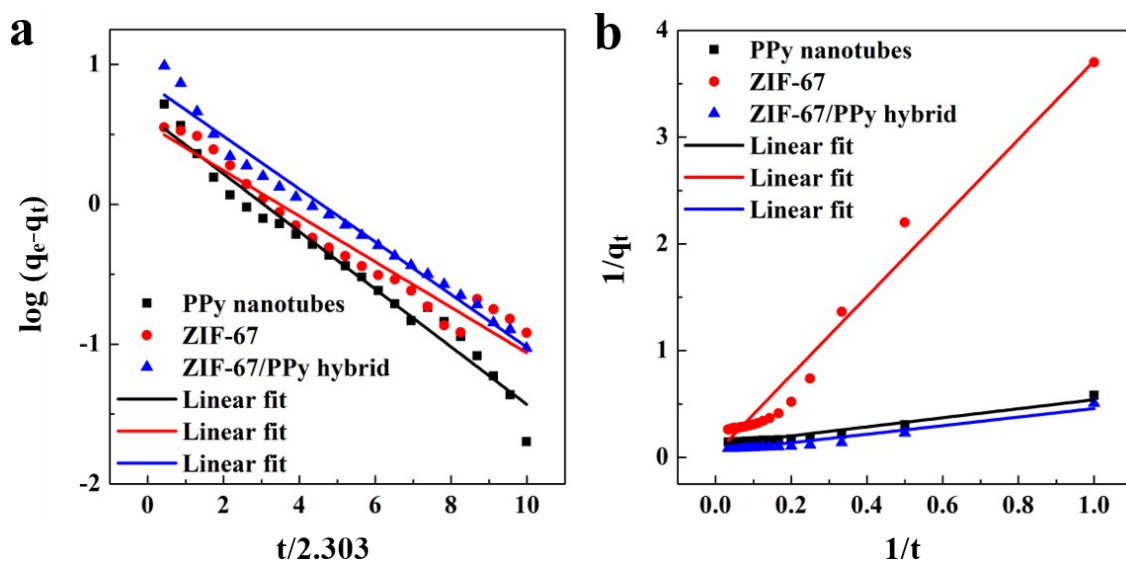

**Fig. S3** The linear fittings for experimental data of the NaCl electroSORPTION using (a) pseudo-first- and (b) pseudo-second-order kinetic models.

**Table S3.** Coefficients of kinetic models for the electroSORPTION of PPy nanotubes, pure ZIF-67, and ZIF-67/PPy hybrid.

| Sample                    |       | PPy nanotubes         | ZIF-67                | ZIF-67/PPy hybrid     |
|---------------------------|-------|-----------------------|-----------------------|-----------------------|
| Pseudo-first-order model  | $k_1$ | 0.2062                | 0.1631                | 0.1887                |
|                           | $r^2$ | 0.971                 | 0.948                 | 0.980                 |
| Pseudo-second-order model | $k_2$ | $3.25 \times 10^{-2}$ | $3.54 \times 10^{-4}$ | $8.28 \times 10^{-3}$ |
|                           | $r^2$ | 0.958                 | 0.969                 | 0.936                 |



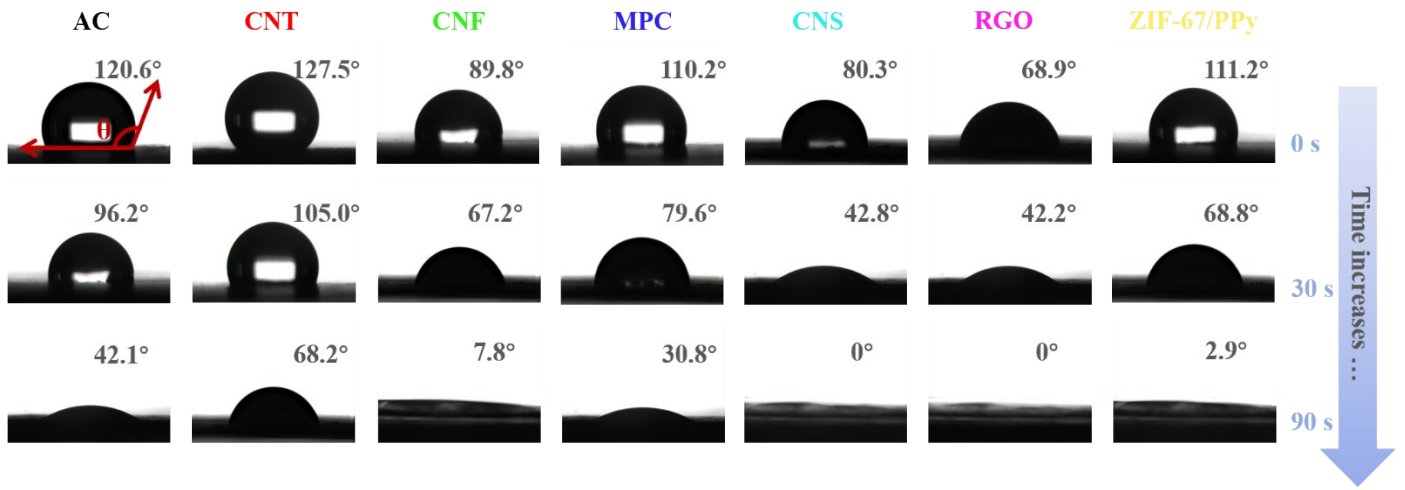

**Fig. S4** Optical micrographs of the water contact angles on the surface of typical carbons (AC, CNT, CNF, MPC, CNS and RGO) and ZIF-67/PPy electrodes as a function of contact time.

## References

1. J.-P. Simonin, *Chem. Eng. J.*, 2016, **300**, 254-263.
2. W. Tang, D. He, C. Zhang, P. Kovalsky and T. D. Waite, *Water Res.*, 2017, **120**, 229-237.
3. D. He, C. E. Wong, W. Tang, P. Kovalsky and T. D. Waite, *Environ. Sci. Technol. Lett.*, 2016, **3**, 222-226.
4. R. L. Zornitta, F. J. García-Mateos, J. J. Lado, J. Rodríguez-Mirasol, T. Cordero, P. Hammer and L. A. M. Ruotolo, *Carbon*, 2017, **123**, 318-333.
5. S. Rezma, I. B. Assaker, Y. Iltaiem, R. Chtourou, A. Hafiane and H. Deleuze, *Mater. Res. Bull.*, 2019, **111**, 222-229.
6. C.-L. Yeh, H.-C. Hsi, K.-C. Li and C.-H. Hou, *Desalination*, 2015, **367**, 60-68.
7. Y. Liu, L. Pan, T. Chen, X. Xu, T. Lu, Z. Sun and D. H. C. Chua, *Electrochim. Acta*, 2015, **151**, 489-496.
8. L. Zhang, Y. Liu, T. Lu and L. Pan, *J. Electroanal. Chem.*, 2017, **804**, 179-184.
9. Y. Li, I. Hussain, J. Qi, C. Liu, J. Li, J. Shen, X. Sun, W. Han and L. Wang, *Sep. Purif. Technol.*, 2016, **165**, 190-198.
10. G.-X. Li, P.-X. Hou, S.-Y. Zhao, C. Liu and H.-M. Cheng, *Carbon*, 2016, **101**, 1-8.
11. T. Wu, G. Wang, Q. Dong, F. Zhan, X. Zhang, S. Li, H. Qiao and J. Qiu, *Environ. Sci. Technol.*, 2017, **51**, 9244-9251.
12. O. Noonan, Y. Liu, X. Huang and C. Yu, *J. Mater. Chem. A*, 2018, **6**, 14272-14280.
13. X. Xu, Y. Liu, M. Wang, X. Yang, C. Zhu, T. Lu, R. Zhao and L. Pan, *Electrochim. Acta*, 2016, **188**, 406-413.
14. Z. Li, B. Song, Z. Wu, Z. Lin, Y. Yao, K.-S. Moon and C. P. Wong, *Nano Energy*, 2015, **11**, 711-718.
15. G. Zhu, W. Wang, X. Li, J. Zhu, H. Wang and L. Zhang, *RSC Adv.*, 2016, **6**, 5817-5823.
16. X. Xu, L. Pan, Y. Liu, T. Lu, Z. Sun and D. H. C. Chua, *Sci. Rep.*, 2015, **5**, 8458.
17. M. Wang, X. Xu, J. Tang, S. Hou, M. S. A. Hossain, L. Pan and Y. Yamauchi, *Chem. Commun.*, 2017, **53**, 10784-10787.
18. Y. Liu, J. Ma, T. Lu and L. Pan, *Sci. Rep.*, 2016, **6**, 32784.
19. X. Duan, W. Liu and L. Chang, *J. Taiwan Inst. Chem. E.*, 2016, **62**, 132-139.
20. J. Zhang, J. Fang, J. Han, T. Yan, L. Shi and D. Zhang, *J. Mater. Chem. A*, 2018, **6**, 15245-15252.
21. N.-L. Liu, S. Dutta, R. R. Salunkhe, T. Ahamad, S. M. Alshehri, Y. Yamauchi, C.-H. Hou and K. C. W. Wu, *Sci. Rep.*, 2016, **6**, 28847.
22. Y. Liu, X. Xu, M. Wang, T. Lu, Z. Sun and L. Pan, *Chem. Commun.*, 2015, **51**, 12020-12023.
